# Supplementary material
Source: PubMed Central journal article supplement (PMC4249286)
Supplement: IAI.02462-14_zii999090984so1.pdf [file IAI.02462-14_zii999090984so1.pdf]

**Figure S1.** 4-12% SDS-PAGE gel showing T3SP preparations used to elicit antigen recall responses.

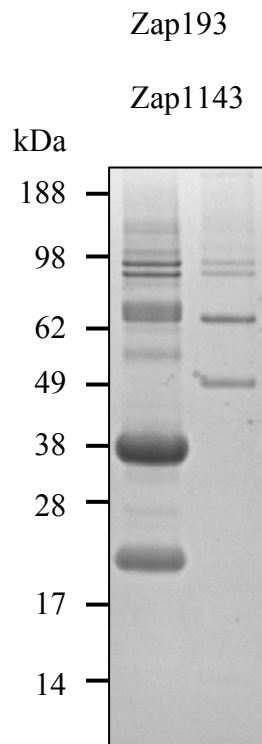

**Figure S2.** Gating strategy used for analysis of Ki67 expression by *ex-vivo* re-stimulated rectal lymph node cells.

a. Morphology:

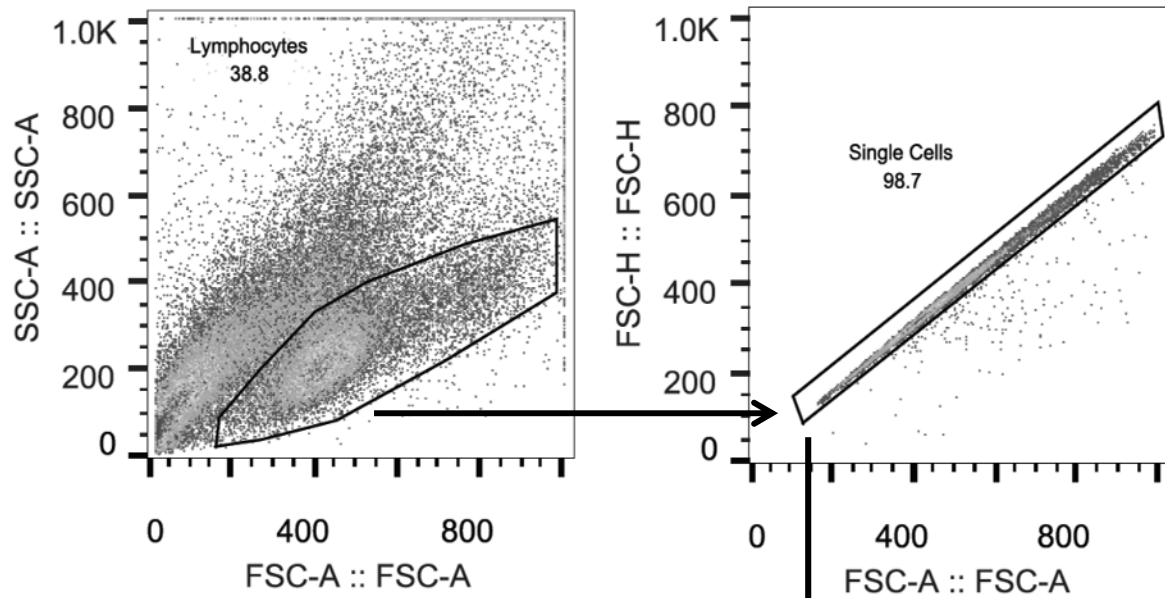

b. Vital stain:

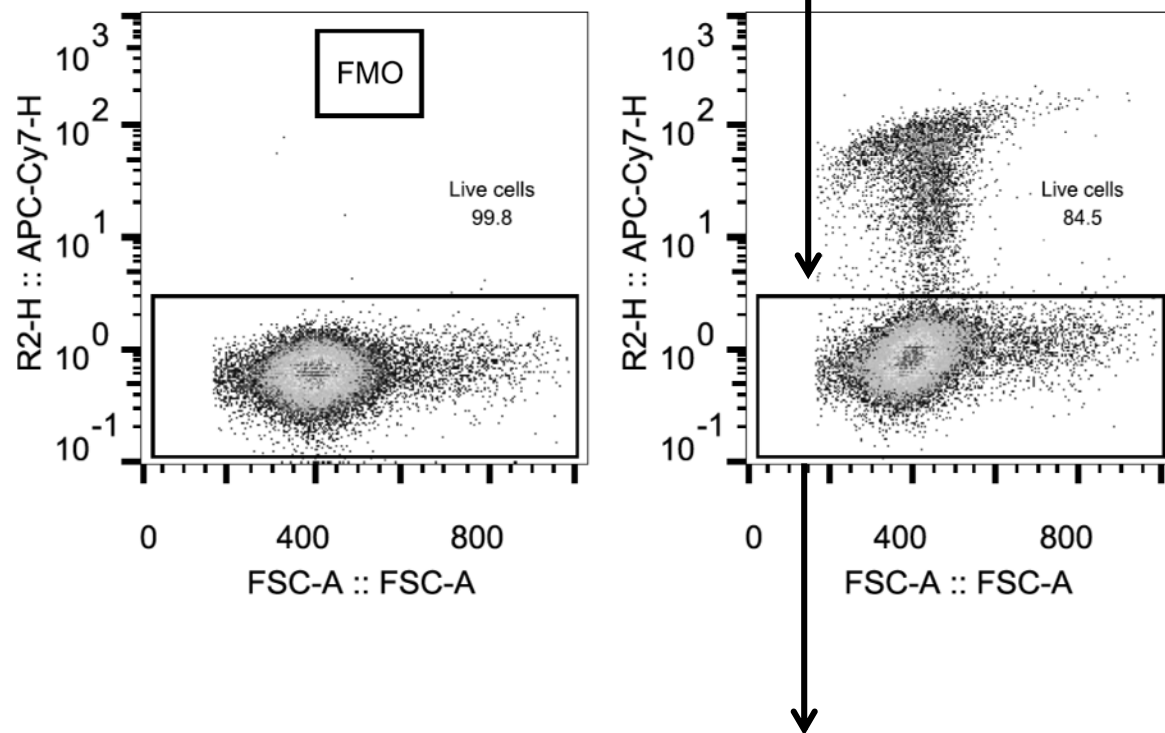

c. Fluorescence minus one (FMO) controls:

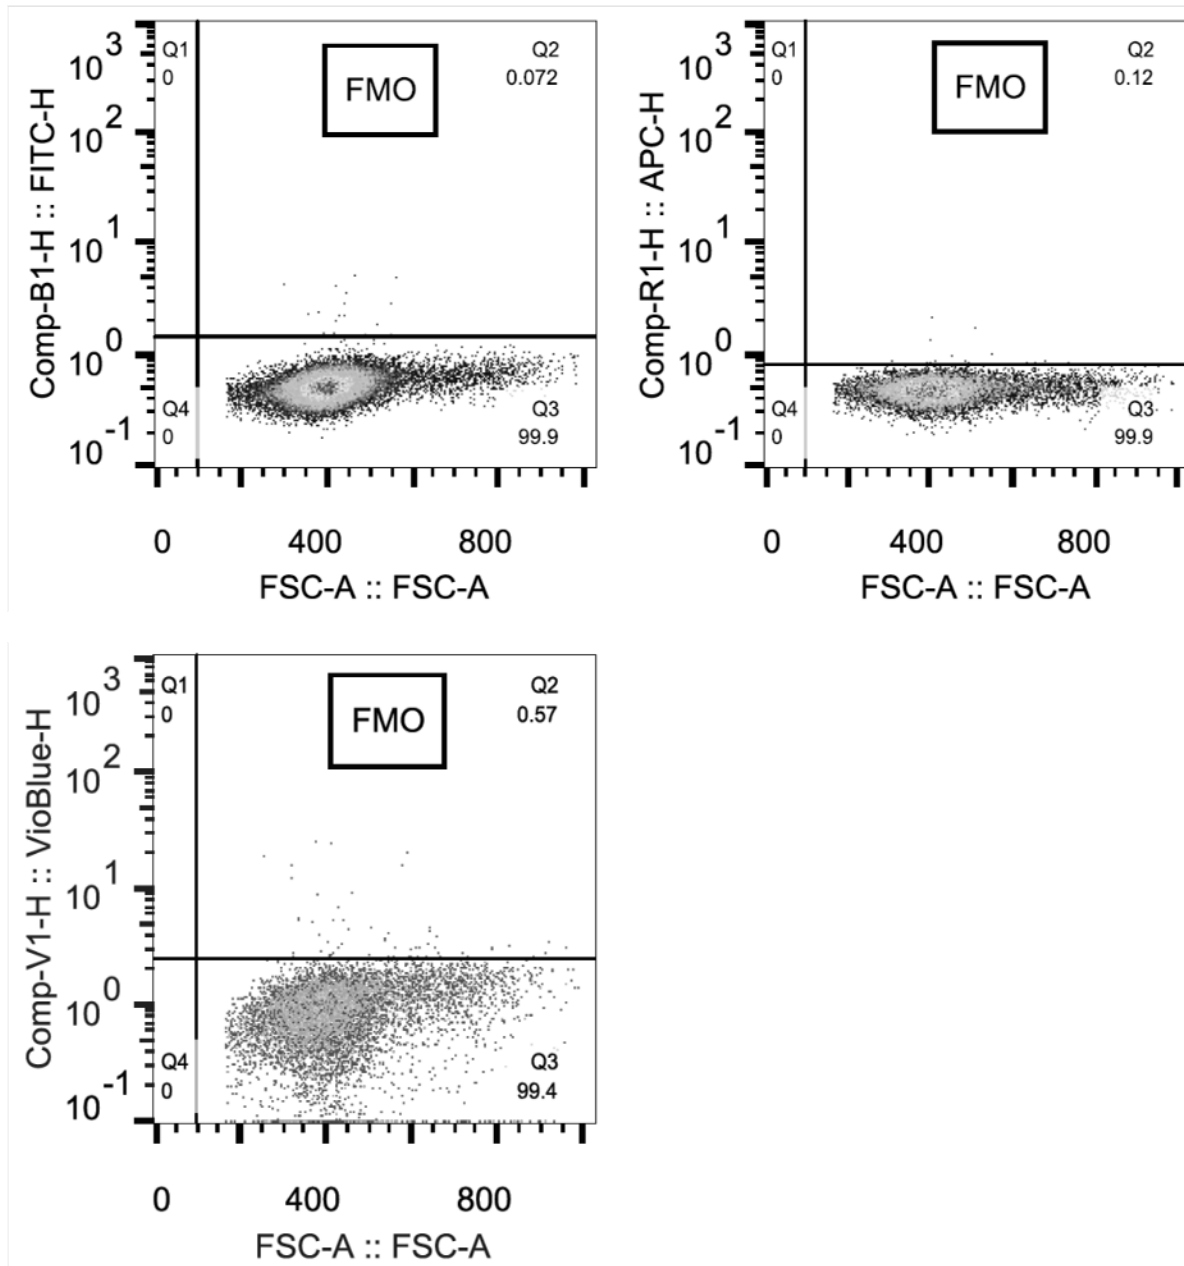

d. CD4<sup>+</sup> cell gating:

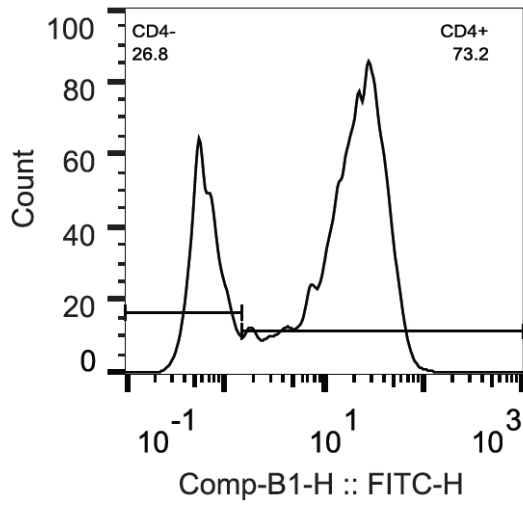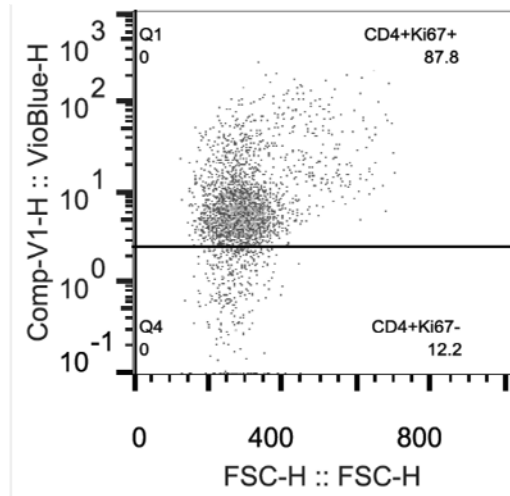

e. CD8<sup>+</sup> cell gating:

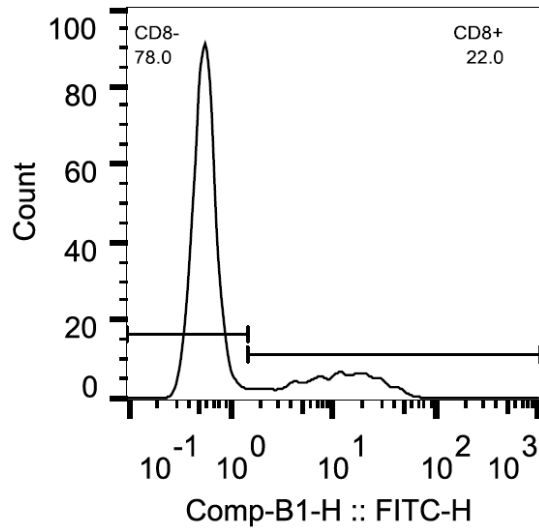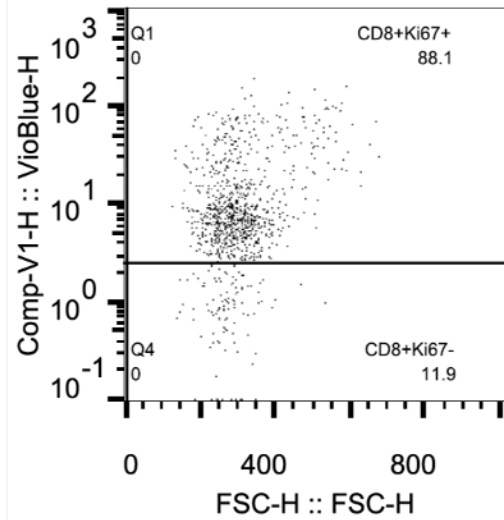

f. TcR1-N24( $\delta$ )<sup>+</sup> cell gating:

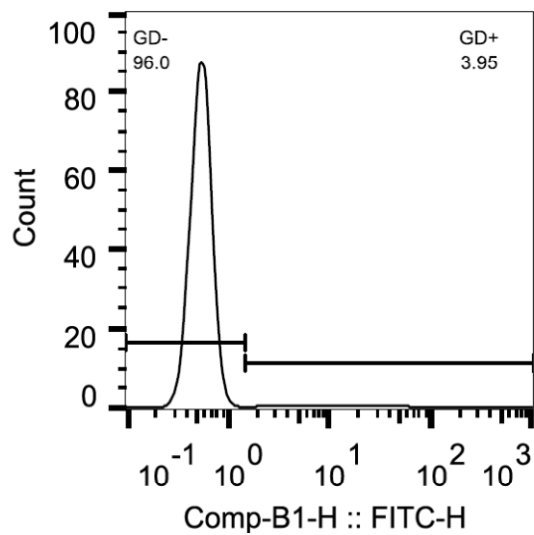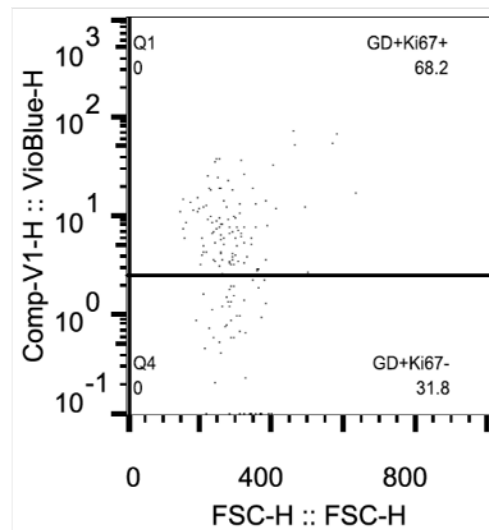

g. NKp46<sup>+</sup> cell gating:

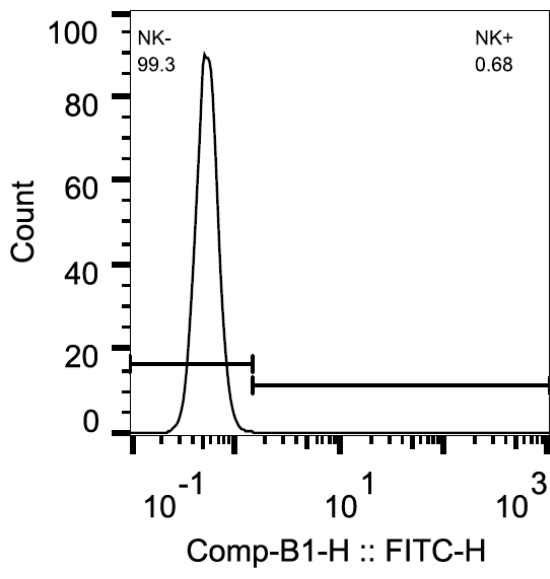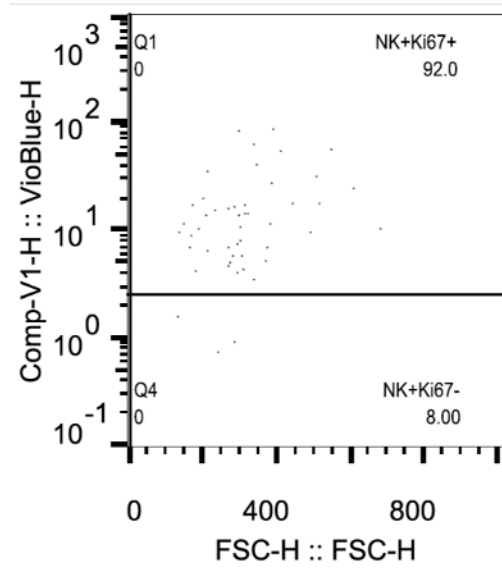

**Table S1.** External primers used for cloning of gene fragments for standard curve plasmid generation.

| <b>Gene</b> | <b>Direction</b> | <b>Sequence</b>           |
|-------------|------------------|---------------------------|
| FoxP3       | F                | GGAGTGGGTTTCCAGGGAGCCA    |
|             | R                | TGCCTGGCAGTGCTTGAGGAA     |
| T-bet       | F                | GGGCTTCCAACAATGCGACCCA    |
|             | R                | AAGTTCTCCCGGAATCCTTTGGC   |
| IL17        | F                | CCGGAGCACAAACTCCAGAAGGC   |
|             | R                | TGATGGTCCACCTTCCCTTCAGC   |
| IL22        | F                | CGAAGCGCTGCTACGTGCTGAA    |
|             | R                | TCTGGATGTGCTGGTTGTCAGACTC |
| RORC        | F                | CCGGGCCTACAACGCTGACA      |
|             | R                | AAAGGCCAGCTCCAGATTGCAC    |
| GATA3       | F                | ACCATACGTCCCCGAGTACAGC    |
|             | R                | TACCTGCCCTTCTTGCTGCCGA    |

**Table S2.** Internal primers used for RT-qPCR analysis of gene expression.

| Gene                     | Direction | Sequence                    | Reference |
|--------------------------|-----------|-----------------------------|-----------|
| FoxP3                    | F         | GACAGCACCCCTTTCGACTGT       |           |
|                          | R         | CCACTTGCAGACGCCATTTG        |           |
| GATA3                    | F         | TGTGTGAACTGTGGGGCGACAT      |           |
|                          | R         | TACACAGGTAATGCCCGGTTCCGT    |           |
| IFN $\gamma$             | F         | CTTGAATGGCAGCTCTGAGAAA      | (1)       |
|                          | R         | TGCAGATCATCCACCGGAAT        |           |
| T-bet                    | F         | GGGCTTCCAACAATGCGACCCA      |           |
|                          | R         | AAGTTCTCCCGGAATCCTTTGGC     |           |
| IL17                     | F         | CCGGAGCACAAACTCCAGAAGGC     |           |
|                          | R         | TGATGGTCCACCTTCCCTTCAGC     |           |
| RORC                     | F         | GAGTGCCTTGCGCTTTTCA         | (1)       |
|                          | R         | AAAGGCCAGCTCCAGATTGCAC      |           |
| TNF $\alpha$             | F         | TCTACCAGGGAGGAGTCTTCCA      | (1)       |
|                          | R         | TGCACCCTCACAGGGCGATGAT      |           |
| IL10                     | F         | GCGGCGCTGTCATCGCTTTC        |           |
|                          | R         | GATGAAGATGTCAAACCTCACTCATGG |           |
| IL4                      | F         | GCCACA CGTGCT TGAACAAA      | (2)       |
|                          | R         | TGCTTGCCAAGC TGTTGAGA       |           |
| IL22                     | F         | GTGCTGTTCCCCCAATCTGA        |           |
|                          | R         | AGCTTTTTGCTGAGCCTGGA        |           |
| IL13                     | F         | GGATGACACTGCAGTTGGAGA       |           |
|                          | R         | TCTGCTACAGCCCTCAAGGA        |           |
| TGF $\beta$ <sub>1</sub> | F         | CGCTGCCCGAGGCCATACTG        |           |
|                          | R         | GCTCAGGCTCCGTTTCGGCA        |           |

**Table S3.** qPCR standard curve dynamic range.

| Gene          | Gene copies/well |                 | Regression $r^2$<br>range (all plates) |
|---------------|------------------|-----------------|----------------------------------------|
|               | Top standard     | Bottom standard |                                        |
| ATP5B         | $10^6$           | $10^3$          | 0.990-0.995                            |
| GAPDH         | $10^6$           | $10^3$          | 0.998-0.999                            |
| FoxP3         | $10^7$           | $10^2$          | 0.991-0.995                            |
| GATA3         | $10^7$           | $10^3$          | 0.996-0.996                            |
| IFN $\gamma$  | $10^7$           | $10^2$          | 0.997-0.999                            |
| T-bet         | $10^7$           | $10^3$          | 0.995-0.998                            |
| IL17          | $10^7$           | $10^4$          | 0.996-0.999                            |
| RORC          | $10^7$           | $10^2$          | 0.993-0.999                            |
| TNF $\alpha$  | $10^7$           | $10^2$          | 0.994-0.999                            |
| IL10          | $10^6$           | $10^2$          | 0.993-0.997                            |
| IL4           | $10^7$           | $10^2$          | 0.994-0.998                            |
| IL22          | $10^8$           | $10^3$          | 0.996-0.997                            |
| IL13          | $10^7$           | $10^3$          | 0.983-0.993                            |
| TGF $\beta_1$ | $10^7$           | $10^1$          | 0.994-0.996                            |



**Table S4.** Test results for the fixed effects of the linear mixed models used to analyse changes in gene expression at the terminal rectum.

| Gene          | Fixed Effect                    | Num DF | Den DF | F Value | Pr > F |
|---------------|---------------------------------|--------|--------|---------|--------|
| FoxP3         | Log10(Expression pre-challenge) | 1      | 6      | 5.31    | 0.0607 |
| FoxP3         | Experimental group              | 2      | 6      | 1.63    | 0.2729 |
| FoxP3         | Days post challenge             | 3      | 21     | 1.92    | 0.1575 |
| FoxP3         | Days*group interaction          | 6      | 21     | 2.35    | 0.0679 |
| GATA3         | Log10(Expression pre-challenge) | 1      | 6      | 29.71   | 0.0016 |
| GATA3         | Experimental group              | 2      | 6      | 0.75    | 0.5105 |
| GATA3         | Days post challenge             | 3      | 21     | 4.64    | 0.0122 |
| GATA3         | Days*group interaction          | 6      | 21     | 1.09    | 0.402  |
| IFN $\gamma$  | Log10(Expression pre-challenge) | 1      | 6      | 9.87    | 0.02   |
| IFN $\gamma$  | Experimental group              | 2      | 6      | 3.25    | 0.1107 |
| IFN $\gamma$  | Days post challenge             | 3      | 21     | 1.49    | 0.245  |
| IFN $\gamma$  | Days*group interaction          | 6      | 21     | 4.11    | 0.007  |
| IL10          | Log10(Expression pre-challenge) | 1      | 6      | 15.96   | 0.0072 |
| IL10          | Experimental group              | 2      | 6      | 3.76    | 0.0875 |
| IL10          | Days post challenge             | 3      | 21     | 3.02    | 0.0528 |
| IL10          | Days*group interaction          | 6      | 21     | 2.98    | 0.0288 |
| IL17          | Log10(Expression pre-challenge) | 1      | 6      | 31.23   | 0.0014 |
| IL17          | Experimental group              | 2      | 6      | 3.53    | 0.097  |
| IL17          | Days post challenge             | 3      | 21     | 2.45    | 0.0917 |
| IL17          | Days*group interaction          | 6      | 21     | 0.26    | 0.9506 |
| IL22          | Log10(Expression pre-challenge) | 1      | 6      | 21.39   | 0.0036 |
| IL22          | Experimental group              | 2      | 6      | 4.81    | 0.0566 |
| IL22          | Days post challenge             | 3      | 21     | 2.97    | 0.0551 |
| IL22          | Days*group interaction          | 6      | 21     | 0.69    | 0.6567 |
| RORC          | Log10(Expression pre-challenge) | 1      | 6      | 101.22  | <.0001 |
| RORC          | Experimental group              | 2      | 6      | 0.56    | 0.5959 |
| RORC          | Days post challenge             | 3      | 21     | 2.27    | 0.1105 |
| RORC          | Days*group interaction          | 6      | 21     | 0.29    | 0.9354 |
| Tbet          | Log10(Expression pre-challenge) | 1      | 6      | 36.15   | 0.001  |
| Tbet          | Experimental group              | 2      | 6      | 10.66   | 0.0106 |
| Tbet          | Days post challenge             | 3      | 21     | 8.46    | 0.0007 |
| Tbet          | Days*group interaction          | 6      | 21     | 11.77   | <.0001 |
| TGF $\beta$ 1 | Log10(Expression pre-challenge) | 1      | 6      | 5.54    | 0.0567 |
| TGF $\beta$ 1 | Experimental group              | 2      | 6      | 25.44   | 0.0012 |
| TGF $\beta$ 1 | Days post challenge             | 3      | 21     | 5.36    | 0.0067 |
| TGF $\beta$ 1 | Days*group interaction          | 6      | 21     | 15.27   | <.0001 |
| TNF $\alpha$  | Log10(Expression pre-challenge) | 1      | 6      | 13.9    | 0.0098 |
| TNF $\alpha$  | Experimental group              | 2      | 6      | 4.34    | 0.0683 |
| TNF $\alpha$  | Days post challenge             | 3      | 21     | 1.48    | 0.2496 |

|              |                        |   |    |      |        |
|--------------|------------------------|---|----|------|--------|
| TNF $\alpha$ | Days*group interaction | 6 | 21 | 0.32 | 0.9188 |
|--------------|------------------------|---|----|------|--------|

**Table S5.** Predicted means and 95% confidence intervals from the linear mixed models used to analyse changes in gene expression at the terminal rectum.

| Gene  | Group   | Days post challenge | Estimated Fold Change | 95% CIs |       | t Value | p      |
|-------|---------|---------------------|-----------------------|---------|-------|---------|--------|
|       |         |                     |                       | Lower   | Upper |         |        |
| IFNg  | Control | 7                   | 0.73                  | 0.36    | 1.51  | -0.89   | 0.3837 |
| IFNg  | PT2128  | 7                   | 0.96                  | 0.59    | 1.58  | -0.15   | 0.8815 |
| IFNg  | PT32    | 7                   | 2.79                  | 1.72    | 4.52  | 4.41    | 0.0002 |
| IFNg  | Control | 14                  | 1.14                  | 0.55    | 2.34  | 0.37    | 0.7146 |
| IFNg  | PT2128  | 14                  | 0.81                  | 0.49    | 1.32  | -0.90   | 0.3802 |
| IFNg  | PT32    | 14                  | 2.35                  | 1.45    | 3.81  | 3.67    | 0.0014 |
| IFNg  | Control | 21                  | 1.08                  | 0.53    | 2.23  | 0.23    | 0.8185 |
| IFNg  | PT2128  | 21                  | 2.47                  | 1.51    | 4.04  | 3.83    | 0.001  |
| IFNg  | PT32    | 21                  | 1.62                  | 1.00    | 2.63  | 2.09    | 0.0492 |
| IFNg  | Control | 31                  | 1.15                  | 0.56    | 2.36  | 0.40    | 0.6906 |
| IFNg  | PT2128  | 31                  | 1.16                  | 0.71    | 1.90  | 0.63    | 0.5357 |
| IFNg  | PT32    | 31                  | 0.86                  | 0.53    | 1.40  | -0.63   | 0.5328 |
| Tbet  | Control | 7                   | 0.38                  | 0.21    | 0.69  | -3.42   | 0.0026 |
| Tbet  | PT2128  | 7                   | 1.69                  | 1.11    | 2.59  | 2.60    | 0.0169 |
| Tbet  | PT32    | 7                   | 2.93                  | 1.93    | 4.44  | 5.37    | <.0001 |
| Tbet  | Control | 14                  | 1.11                  | 0.62    | 2.00  | 0.38    | 0.7079 |
| Tbet  | PT2128  | 14                  | 0.50                  | 0.33    | 0.76  | -3.40   | 0.0027 |
| Tbet  | PT32    | 14                  | 0.61                  | 0.40    | 0.92  | -2.49   | 0.0214 |
| Tbet  | Control | 21                  | 0.22                  | 0.12    | 0.39  | -5.39   | <.0001 |
| Tbet  | PT2128  | 21                  | 2.09                  | 1.37    | 3.19  | 3.63    | 0.0016 |
| Tbet  | PT32    | 21                  | 0.55                  | 0.36    | 0.83  | -3.03   | 0.0064 |
| Tbet  | Control | 31                  | 0.53                  | 0.29    | 0.95  | -2.26   | 0.0346 |
| Tbet  | PT2128  | 31                  | 0.34                  | 0.23    | 0.53  | -5.25   | <.0001 |
| Tbet  | PT32    | 31                  | 0.58                  | 0.38    | 0.88  | -2.70   | 0.0133 |
| TNFa  | Control | 7                   | 0.97                  | 0.58    | 1.64  | -0.11   | 0.9146 |
| TNFa  | PT2128  | 7                   | 0.99                  | 0.68    | 1.43  | -0.07   | 0.9442 |
| TNFa  | PT32    | 7                   | 1.29                  | 0.89    | 1.87  | 1.42    | 0.1706 |
| TNFa  | Control | 14                  | 1.28                  | 0.76    | 2.16  | 0.99    | 0.3324 |
| TNFa  | PT2128  | 14                  | 1.05                  | 0.73    | 1.53  | 0.30    | 0.7696 |
| TNFa  | PT32    | 14                  | 1.26                  | 0.86    | 1.82  | 1.27    | 0.2182 |
| TNFa  | Control | 21                  | 0.75                  | 0.44    | 1.26  | -1.16   | 0.2577 |
| TNFa  | PT2128  | 21                  | 0.97                  | 0.67    | 1.41  | -0.16   | 0.8772 |
| TNFa  | PT32    | 21                  | 1.38                  | 0.95    | 2.00  | 1.79    | 0.0887 |
| TNFa  | Control | 31                  | 0.74                  | 0.44    | 1.24  | -1.22   | 0.2342 |
| TNFa  | PT2128  | 31                  | 0.81                  | 0.55    | 1.17  | -1.20   | 0.2419 |
| TNFa  | PT32    | 31                  | 0.94                  | 0.65    | 1.37  | -0.33   | 0.7434 |
| GATA3 | Control | 7                   | 1.33                  | 0.57    | 3.13  | 0.70    | 0.4897 |
| GATA3 | PT2128  | 7                   | 1.11                  | 0.60    | 2.06  | 0.35    | 0.7277 |

|       |         |    |      |      |       |       |        |
|-------|---------|----|------|------|-------|-------|--------|
| GATA3 | PT32    | 7  | 0.76 | 0.45 | 1.29  | -1.07 | 0.2989 |
| GATA3 | Control | 14 | 0.94 | 0.40 | 2.19  | -0.16 | 0.872  |
| GATA3 | PT2128  | 14 | 1.96 | 1.06 | 3.64  | 2.27  | 0.0337 |
| GATA3 | PT32    | 14 | 1.25 | 0.74 | 2.12  | 0.88  | 0.3894 |
| GATA3 | Control | 21 | 1.34 | 0.57 | 3.13  | 0.70  | 0.4886 |
| GATA3 | PT2128  | 21 | 2.23 | 1.20 | 4.14  | 2.70  | 0.0134 |
| GATA3 | PT32    | 21 | 2.65 | 1.56 | 4.50  | 3.83  | 0.001  |
| GATA3 | Control | 31 | 0.51 | 0.22 | 1.19  | -1.66 | 0.1109 |
| GATA3 | PT2128  | 31 | 1.34 | 0.72 | 2.48  | 0.97  | 0.3414 |
| GATA3 | PT32    | 31 | 0.85 | 0.50 | 1.44  | -0.66 | 0.5168 |
| IL17  | Control | 7  | 0.73 | 0.42 | 1.28  | -1.17 | 0.2558 |
| IL17  | PT2128  | 7  | 1.08 | 0.73 | 1.60  | 0.39  | 0.699  |
| IL17  | PT32    | 7  | 1.32 | 0.89 | 1.97  | 1.46  | 0.1596 |
| IL17  | Control | 14 | 0.81 | 0.46 | 1.41  | -0.80 | 0.4314 |
| IL17  | PT2128  | 14 | 0.80 | 0.54 | 1.18  | -1.19 | 0.2466 |
| IL17  | PT32    | 14 | 0.88 | 0.59 | 1.31  | -0.66 | 0.5146 |
| IL17  | Control | 21 | 0.63 | 0.36 | 1.10  | -1.72 | 0.0992 |
| IL17  | PT2128  | 21 | 0.85 | 0.57 | 1.26  | -0.88 | 0.3862 |
| IL17  | PT32    | 21 | 0.87 | 0.59 | 1.30  | -0.72 | 0.4823 |
| IL17  | Control | 31 | 0.57 | 0.32 | 0.99  | -2.11 | 0.0467 |
| IL17  | PT2128  | 31 | 0.55 | 0.37 | 0.81  | -3.16 | 0.0047 |
| IL17  | PT32    | 31 | 0.70 | 0.47 | 1.04  | -1.90 | 0.0713 |
| IL22  | Control | 7  | 1.22 | 0.42 | 3.54  | 0.38  | 0.706  |
| IL22  | PT2128  | 7  | 0.43 | 0.20 | 0.89  | -2.40 | 0.0257 |
| IL22  | PT32    | 7  | 0.65 | 0.31 | 1.34  | -1.24 | 0.2271 |
| IL22  | Control | 14 | 0.73 | 0.25 | 2.11  | -0.62 | 0.541  |
| IL22  | PT2128  | 14 | 0.78 | 0.37 | 1.63  | -0.71 | 0.4876 |
| IL22  | PT32    | 14 | 1.95 | 0.94 | 4.04  | 1.89  | 0.0722 |
| IL22  | Control | 21 | 1.52 | 0.52 | 4.42  | 0.82  | 0.4238 |
| IL22  | PT2128  | 21 | 0.64 | 0.31 | 1.34  | -1.25 | 0.2252 |
| IL22  | PT32    | 21 | 1.55 | 0.75 | 3.23  | 1.25  | 0.2245 |
| IL22  | Control | 31 | 0.55 | 0.19 | 1.61  | -1.15 | 0.2633 |
| IL22  | PT2128  | 31 | 0.36 | 0.17 | 0.76  | -2.86 | 0.0094 |
| IL22  | PT32    | 31 | 0.44 | 0.21 | 0.92  | -2.31 | 0.0314 |
| FoxP3 | Control | 7  | 4.67 | 1.50 | 14.54 | 2.82  | 0.0102 |
| FoxP3 | PT2128  | 7  | 0.35 | 0.13 | 0.96  | -2.16 | 0.0423 |
| FoxP3 | PT32    | 7  | 1.62 | 0.67 | 3.89  | 1.14  | 0.2675 |
| FoxP3 | Control | 14 | 1.89 | 0.61 | 5.89  | 1.17  | 0.2564 |
| FoxP3 | PT2128  | 14 | 1.48 | 0.54 | 4.06  | 0.80  | 0.4307 |
| FoxP3 | PT32    | 14 | 2.14 | 0.89 | 5.16  | 1.81  | 0.0851 |
| FoxP3 | Control | 21 | 0.98 | 0.32 | 3.06  | -0.03 | 0.9736 |
| FoxP3 | PT2128  | 21 | 0.44 | 0.16 | 1.22  | -1.67 | 0.1091 |
| FoxP3 | PT32    | 21 | 2.77 | 1.15 | 6.67  | 2.42  | 0.0249 |
| FoxP3 | Control | 31 | 1.11 | 0.36 | 3.45  | 0.19  | 0.8511 |

|       |         |    |       |      |       |       |        |
|-------|---------|----|-------|------|-------|-------|--------|
| FoxP3 | PT2128  | 31 | 0.56  | 0.20 | 1.54  | -1.20 | 0.2441 |
| FoxP3 | PT32    | 31 | 1.08  | 0.45 | 2.61  | 0.19  | 0.8519 |
| IL10  | Control | 7  | 0.67  | 0.38 | 1.18  | -1.48 | 0.1528 |
| IL10  | PT2128  | 7  | 0.58  | 0.40 | 0.84  | -3.04 | 0.0062 |
| IL10  | PT32    | 7  | 1.08  | 0.73 | 1.60  | 0.40  | 0.693  |
| IL10  | Control | 14 | 0.65  | 0.37 | 1.14  | -1.60 | 0.1252 |
| IL10  | PT2128  | 14 | 0.81  | 0.56 | 1.16  | -1.22 | 0.2352 |
| IL10  | PT32    | 14 | 0.99  | 0.67 | 1.47  | -0.04 | 0.9695 |
| IL10  | Control | 21 | 1.59  | 0.90 | 2.81  | 1.69  | 0.1051 |
| IL10  | PT2128  | 21 | 0.66  | 0.46 | 0.96  | -2.34 | 0.0295 |
| IL10  | PT32    | 21 | 1.46  | 0.98 | 2.17  | 1.99  | 0.0593 |
| IL10  | Control | 31 | 0.42  | 0.24 | 0.74  | -3.17 | 0.0047 |
| IL10  | PT2128  | 31 | 1.02  | 0.71 | 1.48  | 0.12  | 0.9045 |
| IL10  | PT32    | 31 | 0.92  | 0.62 | 1.36  | -0.45 | 0.6563 |
| TGFb  | Control | 7  | 12.64 | 4.89 | 32.70 | 5.55  | <.0001 |
| TGFb  | PT2128  | 7  | 0.05  | 0.02 | 0.11  | -8.14 | <.0001 |
| TGFb  | PT32    | 7  | 1.27  | 0.81 | 1.98  | 1.12  | 0.2759 |
| TGFb  | Control | 14 | 5.46  | 2.11 | 14.13 | 3.72  | 0.0013 |
| TGFb  | PT2128  | 14 | 0.30  | 0.14 | 0.63  | -3.32 | 0.0032 |
| TGFb  | PT32    | 14 | 2.38  | 1.53 | 3.71  | 4.07  | 0.0005 |
| TGFb  | Control | 21 | 7.87  | 3.04 | 20.35 | 4.52  | 0.0002 |
| TGFb  | PT2128  | 21 | 0.09  | 0.04 | 0.20  | -6.45 | <.0001 |
| TGFb  | PT32    | 21 | 5.49  | 3.53 | 8.56  | 7.99  | <.0001 |
| TGFb  | Control | 31 | 2.70  | 1.04 | 6.97  | 2.17  | 0.0416 |
| TGFb  | PT2128  | 31 | 0.21  | 0.10 | 0.46  | -4.23 | 0.0004 |
| TGFb  | PT32    | 31 | 2.48  | 1.59 | 3.86  | 4.25  | 0.0004 |
| RORC  | Control | 7  | 1.03  | 0.57 | 1.85  | 0.10  | 0.9193 |
| RORC  | PT2128  | 7  | 0.85  | 0.56 | 1.30  | -0.79 | 0.4387 |
| RORC  | PT32    | 7  | 0.79  | 0.52 | 1.20  | -1.17 | 0.2541 |
| RORC  | Control | 14 | 0.50  | 0.28 | 0.89  | -2.48 | 0.0218 |
| RORC  | PT2128  | 14 | 0.56  | 0.37 | 0.85  | -2.88 | 0.0089 |
| RORC  | PT32    | 14 | 0.57  | 0.38 | 0.87  | -2.79 | 0.0111 |
| RORC  | Control | 21 | 0.61  | 0.34 | 1.10  | -1.74 | 0.0957 |
| RORC  | PT2128  | 21 | 0.57  | 0.38 | 0.87  | -2.78 | 0.0112 |
| RORC  | PT32    | 21 | 0.77  | 0.51 | 1.17  | -1.30 | 0.2076 |
| RORC  | Control | 31 | 0.48  | 0.27 | 0.86  | -2.61 | 0.0164 |
| RORC  | PT2128  | 31 | 0.61  | 0.40 | 0.92  | -2.50 | 0.0206 |
| RORC  | PT32    | 31 | 0.60  | 0.39 | 0.91  | -2.56 | 0.0183 |

**Table S6.** Stimulation Index Tukey comparisons for data in Figure 4A. Pairwise comparisons were made between the  $\Delta sepL$  and WT T3SP preparations at each lymph node (RLN/MLN/PsLN) and the same T3SP preparation between each lymph node.

| <b>Contrast</b>    | <b>Estimate (fold change)</b> | <b>SE</b> | <b>t.ratio</b> | <b>p.value</b> |
|--------------------|-------------------------------|-----------|----------------|----------------|
| SepL,RLN-WT,RLN    | 1.773215                      | 1.162678  | 3.8            | 0.0058         |
| SepL,MLN-WT,MLN    | 2.829324                      | 1.162678  | 6.9            | <.0001         |
| SepL,PsLN-WT,PsLN  | 1.463793                      | 1.162678  | 2.528          | 0.1391         |
|                    |                               |           |                |                |
| SepL,RLN-SepL,MLN  | 1.762583                      | 1.284968  | 2.26           | 0.2342         |
| SepL,RLN-SepL,PsLN | 15.71546                      | 1.284968  | 10.986         | <.0001         |
| SepL,MLN-SepL,PsLN | 8.91615                       | 1.284968  | 8.726          | <.0001         |
|                    |                               |           |                |                |
| WT,RLN-WT,MLN      | 2.81236                       | 1.284968  | 4.124          | 0.0024         |
| WT,RLN-WT,PsLN     | 12.97315                      | 1.284968  | 10.222         | <.0001         |
| WT,MLN-WT,PsLN     | 4.612903                      | 1.284968  | 6.098          | <.0001         |

**Table S7.** IFN $\gamma$  Release Index Tukey comparisons for data in Figure 4B. Pairwise comparisons were made between the  $\Delta sepL$  and WT T3SP preparations across all lymph nodes combined and for both T3SP preparations combined between each lymph node (RLN/MLN/PsLN).

| <b>Contrast</b> | <b>Estimate (fold change)</b> | <b>SE</b> | <b>z</b> | <b>p.value</b> |
|-----------------|-------------------------------|-----------|----------|----------------|
| sepL-WT         | 2.43204                       | 1.2198    | 4.473    | <0.0001        |
| RLN-MLN         | 1.68822                       | 1.58056   | 1.144    | 0.61659        |
| RLN-PsLN        | 7.22104                       | 1.58056   | 4.319    | <0.0001        |
| MLN-PsLN        | 4.2773                        | 1.58056   | 3.175    | 0.00578        |

**Table S8.** Thymidine incorporation Tukey comparisons for data in Figure 4C. Pairwise comparisons were made between each experimental group (Control/PT2128/PT32) for both T3SP preparations combined within each lymph node (RLN/MLN/PsLN).

| <b>Node = RLN:</b>  |                               |            |                |                |
|---------------------|-------------------------------|------------|----------------|----------------|
| <b>contrast</b>     | <b>Estimate (fold change)</b> | <b>SE</b>  | <b>t.ratio</b> | <b>p.value</b> |
| Control-PT2128      | 0.751470835                   | 1.56838435 | -0.635         | 0.8024         |
| Control-PT32        | 1.985953658                   | 1.56838435 | 1.525          | 0.2964         |
| PT2128-PT32         | 2.642755407                   | 1.44406353 | 2.645          | 0.0355         |
|                     |                               |            |                |                |
| <b>Node = MLN:</b>  |                               |            |                |                |
| <b>contrast</b>     | <b>Estimate (fold change)</b> | <b>SE</b>  | <b>t.ratio</b> | <b>p.value</b> |
| Control-PT2128      | 1.38363787                    | 1.56838435 | 0.722          | 0.7531         |
| Control-PT32        | 1.252827276                   | 1.56838435 | 0.501          | 0.8715         |
| PT2128-PT32         | 0.905458938                   | 1.44406353 | -0.27          | 0.9606         |
|                     |                               |            |                |                |
| <b>Node = PsLN:</b> |                               |            |                |                |
| <b>contrast</b>     | <b>Estimate (fold change)</b> | <b>SE</b>  | <b>t.ratio</b> | <b>p.value</b> |
| Control-PT2128      | 0.491327429                   | 1.56838435 | -1.579         | 0.2725         |
| Control-PT32        | 1.673746493                   | 1.56838435 | 1.144          | 0.4962         |
| PT2128-PT32         | 3.406580609                   | 1.44406353 | 3.336          | 0.0071         |



**Table S9.** IFN $\gamma$  release Tukey comparisons for data in Figure 4D. Pairwise comparisons were made between each experimental group (Control/PT2128/PT32) within each combination of lymph node (RLN/MLN/PsLN) and *ex vivo* stimulant (ConA/Media/WT/WT LPS/sepL/sepL LPS).

| <b><i>Ex vivo</i> stimulant = ConA, Node = RLN:</b>     |                               |           |                |                |
|---------------------------------------------------------|-------------------------------|-----------|----------------|----------------|
| <b>contrast</b>                                         | <b>Estimate (fold change)</b> | <b>SE</b> | <b>t.ratio</b> | <b>p.value</b> |
| Control-PT2128                                          | 1.155679661                   | 2.377298  | 0.167          | 0.9847         |
| Control-PT32                                            | 2.3756318                     | 2.377298  | 0.999          | 0.5811         |
| PT2128-PT32                                             | 2.055614441                   | 2.056001  | 1              | 0.5814         |
|                                                         |                               |           |                |                |
| <b><i>Ex vivo</i> stimulant = Media, Node = RLN:</b>    |                               |           |                |                |
| <b>contrast</b>                                         | <b>Estimate (fold change)</b> | <b>SE</b> | <b>t.ratio</b> | <b>p.value</b> |
| Control-PT2128                                          | 0.243083723                   | 2.377298  | -1.633         | 0.2421         |
| Control-PT32                                            | 0.739760128                   | 2.377298  | -0.348         | 0.9355         |
| PT2128-PT32                                             | 3.043231916                   | 2.056001  | 1.544          | 0.2818         |
|                                                         |                               |           |                |                |
| <b><i>Ex vivo</i> stimulant = WT, Node = RLN:</b>       |                               |           |                |                |
| <b>contrast</b>                                         | <b>Estimate (fold change)</b> | <b>SE</b> | <b>t.ratio</b> | <b>p.value</b> |
| Control-PT2128                                          | 0.262015926                   | 2.377298  | -1.547         | 0.279          |
| Control-PT32                                            | 3.204437312                   | 2.377298  | 1.345          | 0.3781         |
| PT2128-PT32                                             | 12.22993362                   | 2.056001  | 3.474          | 0.0035         |
|                                                         |                               |           |                |                |
| <b><i>Ex vivo</i> stimulant = WT LPS, Node = RLN:</b>   |                               |           |                |                |
| <b>contrast</b>                                         | <b>Estimate (fold change)</b> | <b>SE</b> | <b>t.ratio</b> | <b>p.value</b> |
| Control-PT2128                                          | 0.47105741                    | 2.377298  | -0.869         | 0.6622         |
| Control-PT32                                            | 2.132288281                   | 2.377298  | 0.874          | 0.659          |
| PT2128-PT32                                             | 4.526599593                   | 2.056001  | 2.095          | 0.1039         |
|                                                         |                               |           |                |                |
| <b><i>Ex vivo</i> stimulant = sepL, Node = RLN:</b>     |                               |           |                |                |
| <b>contrast</b>                                         | <b>Estimate (fold change)</b> | <b>SE</b> | <b>t.ratio</b> | <b>p.value</b> |
| Control-PT2128                                          | 0.53463088                    | 2.377298  | -0.723         | 0.7511         |
| Control-PT32                                            | 3.044201951                   | 2.377298  | 1.286          | 0.4104         |
| PT2128-PT32                                             | 5.694025661                   | 2.056001  | 2.413          | 0.0525         |
|                                                         |                               |           |                |                |
| <b><i>Ex vivo</i> stimulant = sepL LPS, Node = RLN:</b> |                               |           |                |                |
| <b>contrast</b>                                         | <b>Estimate (fold change)</b> | <b>SE</b> | <b>t.ratio</b> | <b>p.value</b> |
| Control-PT2128                                          | 0.361006457                   | 2.377298  | -1.177         | 0.473          |
| Control-PT32                                            | 1.360236424                   | 2.377298  | 0.355          | 0.9329         |
| PT2128-PT32                                             | 3.767900537                   | 2.056001  | 1.84           | 0.1698         |
|                                                         |                               |           |                |                |

| <b>Ex vivo stimulant = ConA, Node = MLN:</b>     |                               |           |                |                |
|--------------------------------------------------|-------------------------------|-----------|----------------|----------------|
| <b>contrast</b>                                  | <b>Estimate (fold change)</b> | <b>SE</b> | <b>t.ratio</b> | <b>p.value</b> |
| Control-PT2128                                   | 2.889143678                   | 2.377298  | 1.225          | 0.4446         |
| Control-PT32                                     | 0.939340094                   | 2.377298  | -0.072         | 0.9971         |
| PT2128-PT32                                      | 0.325127512                   | 2.056001  | -1.559         | 0.2753         |
|                                                  |                               |           |                |                |
| <b>Ex vivo stimulant = Media, Node = MLN:</b>    |                               |           |                |                |
| <b>contrast</b>                                  | <b>Estimate (fold change)</b> | <b>SE</b> | <b>t.ratio</b> | <b>p.value</b> |
| Control-PT2128                                   | 0.60769764                    | 2.377298  | -0.575         | 0.834          |
| Control-PT32                                     | 0.29250592                    | 2.377298  | -1.42          | 0.3394         |
| PT2128-PT32                                      | 0.481334621                   | 2.056001  | -1.014         | 0.5722         |
|                                                  |                               |           |                |                |
| <b>Ex vivo stimulant = WT, Node = MLN:</b>       |                               |           |                |                |
| <b>contrast</b>                                  | <b>Estimate (fold change)</b> | <b>SE</b> | <b>t.ratio</b> | <b>p.value</b> |
| Control-PT2128                                   | 0.655027239                   | 2.377298  | -0.489         | 0.8771         |
| Control-PT32                                     | 1.267055125                   | 2.377298  | 0.273          | 0.9597         |
| PT2128-PT32                                      | 1.934354865                   | 2.056001  | 0.915          | 0.6339         |
|                                                  |                               |           |                |                |
| <b>Ex vivo stimulant = WT LPS, Node = MLN:</b>   |                               |           |                |                |
| <b>contrast</b>                                  | <b>Estimate (fold change)</b> | <b>SE</b> | <b>t.ratio</b> | <b>p.value</b> |
| Control-PT2128                                   | 1.177620914                   | 2.377298  | 0.189          | 0.9805         |
| Control-PT32                                     | 0.843120502                   | 2.377298  | -0.197         | 0.9788         |
| PT2128-PT32                                      | 0.715952385                   | 2.056001  | -0.464         | 0.8886         |
|                                                  |                               |           |                |                |
| <b>Ex vivo stimulant = sepL, Node = MLN:</b>     |                               |           |                |                |
| <b>contrast</b>                                  | <b>Estimate (fold change)</b> | <b>SE</b> | <b>t.ratio</b> | <b>p.value</b> |
| Control-PT2128                                   | 1.336551569                   | 2.377298  | 0.335          | 0.9401         |
| Control-PT32                                     | 1.203697033                   | 2.377298  | 0.214          | 0.9751         |
| PT2128-PT32                                      | 0.90059902                    | 2.056001  | -0.145         | 0.9884         |
|                                                  |                               |           |                |                |
| <b>Ex vivo stimulant = sepL LPS, Node = MLN:</b> |                               |           |                |                |
| <b>contrast</b>                                  | <b>Estimate (fold change)</b> | <b>SE</b> | <b>t.ratio</b> | <b>p.value</b> |
| Control-PT2128                                   | 0.902498835                   | 2.377298  | -0.118         | 0.9923         |
| Control-PT32                                     | 0.537846244                   | 2.377298  | -0.716         | 0.7552         |
| PT2128-PT32                                      | 0.595952272                   | 2.056001  | -0.718         | 0.7543         |
|                                                  |                               |           |                |                |
| <b>Ex vivo stimulant = ConA, Node = PSLN:</b>    |                               |           |                |                |
| <b>contrast</b>                                  | <b>Estimate (fold change)</b> | <b>SE</b> | <b>t.ratio</b> | <b>p.value</b> |
| Control-PT2128                                   | 0.907359102                   | 2.377298  | -0.112         | 0.9931         |
| Control-PT32                                     | 4.37622608                    | 2.377298  | 1.705          | 0.2143         |
| PT2128-PT32                                      | 4.823036515                   | 2.056001  | 2.183          | 0.0866         |
|                                                  |                               |           |                |                |

| <b><i>Ex vivo stimulant = Media, Node = PSLN:</i></b>    |                               |           |                |                |
|----------------------------------------------------------|-------------------------------|-----------|----------------|----------------|
| <b>contrast</b>                                          | <b>Estimate (fold change)</b> | <b>SE</b> | <b>t.ratio</b> | <b>p.value</b> |
| Control-PT2128                                           | 0.190852393                   | 2.377298  | -1.913         | 0.1466         |
| Control-PT32                                             | 1.362735438                   | 2.377298  | 0.357          | 0.9321         |
| PT2128-PT32                                              | 7.140258419                   | 2.056001  | 2.727          | 0.0251         |
|                                                          |                               |           |                |                |
| <b><i>Ex vivo stimulant = WT, Node = PSLN:</i></b>       |                               |           |                |                |
| <b>contrast</b>                                          | <b>Estimate (fold change)</b> | <b>SE</b> | <b>t.ratio</b> | <b>p.value</b> |
| Control-PT2128                                           | 0.205716639                   | 2.377298  | -1.826         | 0.1725         |
| Control-PT32                                             | 5.902994791                   | 2.377298  | 2.05           | 0.1117         |
| PT2128-PT32                                              | 28.69478533                   | 2.056001  | 4.657          | 0.0001         |
|                                                          |                               |           |                |                |
| <b><i>Ex vivo stimulant = WT LPS, Node = PSLN:</i></b>   |                               |           |                |                |
| <b>contrast</b>                                          | <b>Estimate (fold change)</b> | <b>SE</b> | <b>t.ratio</b> | <b>p.value</b> |
| Control-PT2128                                           | 0.369841447                   | 2.377298  | -1.149         | 0.4896         |
| Control-PT32                                             | 3.927955328                   | 2.377298  | 1.58           | 0.2645         |
| PT2128-PT32                                              | 10.62064689                   | 2.056001  | 3.278          | 0.0061         |
|                                                          |                               |           |                |                |
| <b><i>Ex vivo stimulant = sepL, Node = PSLN:</i></b>     |                               |           |                |                |
| <b>contrast</b>                                          | <b>Estimate (fold change)</b> | <b>SE</b> | <b>t.ratio</b> | <b>p.value</b> |
| Control-PT2128                                           | 0.419754905                   | 2.377298  | -1.002         | 0.5791         |
| Control-PT32                                             | 5.607820191                   | 2.377298  | 1.991          | 0.1258         |
| PT2128-PT32                                              | 13.35974904                   | 2.056001  | 3.597          | 0.0025         |
|                                                          |                               |           |                |                |
| <b><i>Ex vivo stimulant = sepL LPS, Node = PSLN:</i></b> |                               |           |                |                |
| <b>contrast</b>                                          | <b>Estimate (fold change)</b> | <b>SE</b> | <b>t.ratio</b> | <b>p.value</b> |
| Control-PT2128                                           | 0.283437109                   | 2.377298  | -1.456         | 0.3214         |
| Control-PT32                                             | 2.50573437                    | 2.377298  | 1.061          | 0.543          |
| PT2128-PT32                                              | 8.840530361                   | 2.056001  | 3.024          | 0.0119         |

**Table S10.** Ki67<sup>+</sup> versus Ki67<sup>-</sup> rectal lymph node cell generalised linear model analysis of deviance tables.

| <b>CD4<sup>+</sup></b>   | Df | Deviance | Residual Df | Residual Deviance | F        | Pr(>F)   |
|--------------------------|----|----------|-------------|-------------------|----------|----------|
| NULL                     |    |          | 59          | 49000             |          |          |
| Group                    | 2  | 1728     | 57          | 47272             | 13.5664  | 2.14E-05 |
| Stimulant                | 3  | 44127    | 54          | 3145              | 230.9522 | 2.20E-16 |
| Group:Stimulant          | 6  | 215      | 48          | 2930              | 0.5614   | 0.7587   |
|                          |    |          |             |                   |          |          |
| <b>CD8<sup>+</sup></b>   | Df | Deviance | Residual Df | Residual Deviance | F        | Pr(>F)   |
| NULL                     | 59 | 22757.1  |             |                   |          |          |
| Group                    | 2  | 828.2    | 57          | 21928.9           | 7.5486   | 0.001411 |
| Stimulant                | 3  | 19247.2  | 54          | 2681.7            | 116.9524 | 2.20E-16 |
| Group:Stimulant          | 6  | 64.1     | 48          | 2617.5            | 0.1948   | 0.976762 |
|                          |    |          |             |                   |          |          |
| <b>γδTCR<sup>+</sup></b> | Df | Deviance | Residual Df | Residual Deviance | F        | Pr(>F)   |
| NULL                     | 58 | 2197.29  |             |                   |          |          |
| Group                    | 2  | 172.15   | 56          | 2025.14           | 6.3101   | 0.003737 |
| Stimulant                | 3  | 1315.93  | 53          | 709.21            | 32.1573  | 1.88E-11 |
| Group:Stimulant          | 6  | 64.99    | 47          | 644.22            | 0.7941   | 0.57926  |
|                          |    |          |             |                   |          |          |
| <b>NKp46<sup>+</sup></b> | Df | Deviance | Residual Df | Residual Deviance | F        | Pr(>F)   |
| NULL                     | 59 | 468.48   |             |                   |          |          |
| Group                    | 2  | 59.699   | 57          | 408.78            | 7.3698   | 0.001617 |
| Stimulant                | 3  | 188.32   | 54          | 220.46            | 15.4986  | 3.50E-07 |
| Group:Stimulant          | 6  | 51.205   | 48          | 169.26            | 2.1071   | 0.069641 |

**Table S11.** Ki67<sup>+</sup> versus Ki67<sup>-</sup> rectal lymph node cell Tukey comparison tables (logit scale)

for data in Figure 5. Pairwise comparisons were made between each *ex vivo* stimulant

(ConA/Media/WT/LPS) within each experimental group.

| <b>CD4</b>      |          |          |          |         |
|-----------------|----------|----------|----------|---------|
| Group = Control |          |          |          |         |
| contrast        | estimate | SE       | z.ratio  | p.value |
| ConA-Media      | 4.078103 | 0.659439 | 6.184198 | <.0001  |
| ConA-WT         | 2.409936 | 0.455698 | 5.288448 | <.0001  |
| ConA-LPS        | 3.539619 | 0.711232 | 4.976746 | <.0001  |
| Media-WT        | -1.66817 | 0.758423 | -2.19952 | 0.1234  |
| Media-LPS       | -0.53848 | 0.934556 | -0.57619 | 0.9392  |
| WT-LPS          | 1.129683 | 0.803863 | 1.405318 | 0.496   |
| Group = PT2128  |          |          |          |         |
| contrast        | estimate | SE       | z.ratio  | p.value |
| ConA-Media      | 3.791895 | 0.344895 | 10.99435 | <.0001  |
| ConA-WT         | 1.901821 | 0.189423 | 10.04009 | <.0001  |
| ConA-LPS        | 3.528389 | 0.362439 | 9.735134 | <.0001  |
| Media-WT        | -1.89007 | 0.361278 | -5.23163 | <.0001  |
| Media-LPS       | -0.26351 | 0.475397 | -0.55429 | 0.9454  |
| WT-LPS          | 1.626568 | 0.378062 | 4.30238  | 0.0001  |
| Group = PT32    |          |          |          |         |
| contrast        | estimate | SE       | z.ratio  | p.value |
| ConA-Media      | 3.567561 | 0.455581 | 7.830791 | <.0001  |
| ConA-WT         | 2.406768 | 0.292653 | 8.223953 | <.0001  |
| ConA-LPS        | 3.432117 | 0.460661 | 7.450416 | <.0001  |
| Media-WT        | -1.16079 | 0.509831 | -2.27682 | 0.1035  |
| Media-LPS       | -0.13544 | 0.621683 | -0.21787 | 0.9964  |
| WT-LPS          | 1.025349 | 0.514375 | 1.993387 | 0.1905  |
| <b>CD8</b>      |          |          |          |         |
| Group = Control |          |          |          |         |
| contrast        | estimate | SE       | z.ratio  | p.value |
| ConA-Media      | 3.540999 | 0.826799 | 4.28278  | 0.0001  |
| ConA-WT         | 2.698219 | 0.547318 | 4.929893 | <.0001  |
| ConA-LPS        | 3.483781 | 0.775991 | 4.489461 | <.0001  |
| Media-WT        | -0.84278 | 0.836516 | -1.00749 | 0.745   |
| Media-LPS       | -0.05722 | 1.001181 | -0.05715 | 0.9999  |
| WT-LPS          | 0.785562 | 0.786336 | 0.999016 | 0.75    |

| Group = PT2128             |          |          |          |         |
|----------------------------|----------|----------|----------|---------|
| contrast                   | estimate | SE       | z.ratio  | p.value |
| ConA-Media                 | 3.239418 | 0.332213 | 9.751028 | <.0001  |
| ConA-WT                    | 2.198237 | 0.260266 | 8.446124 | <.0001  |
| ConA-LPS                   | 3.396709 | 0.348758 | 9.73945  | <.0001  |
| Media-WT                   | -1.04118 | 0.290367 | -3.58575 | 0.0019  |
| Media-LPS                  | 0.157291 | 0.371761 | 0.423097 | 0.9745  |
| WT-LPS                     | 1.198472 | 0.309159 | 3.876555 | 0.0006  |
|                            |          |          |          |         |
| Group = PT32               |          |          |          |         |
| contrast                   | estimate | SE       | z.ratio  | p.value |
| ConA-Media                 | 3.010154 | 0.520678 | 5.781225 | <.0001  |
| ConA-WT                    | 2.095138 | 0.317463 | 6.599625 | <.0001  |
| ConA-LPS                   | 3.441522 | 0.51134  | 6.730398 | <.0001  |
| Media-WT                   | -0.91502 | 0.518703 | -1.76405 | 0.2909  |
| Media-LPS                  | 0.431368 | 0.655544 | 0.65803  | 0.9127  |
| WT-LPS                     | 1.346383 | 0.509329 | 2.643446 | 0.041   |
|                            |          |          |          |         |
| $\gamma\delta\text{TCR}^+$ |          |          |          |         |
| Group = Control            |          |          |          |         |
| contrast                   | estimate | SE       | z.ratio  | p.value |
| ConA-Media                 | 0.050874 | 0.654942 | 0.077677 | 0.9998  |
| ConA-WT                    | -0.91047 | 0.550979 | -1.65245 | 0.3493  |
| ConA-LPS                   | -0.52537 | 0.645408 | -0.81401 | 0.8479  |
| Media-WT                   | -0.96134 | 0.524664 | -1.8323  | 0.2581  |
| Media-LPS                  | -0.57624 | 0.623094 | -0.92481 | 0.7916  |
| WT-LPS                     | 0.385097 | 0.512713 | 0.751096 | 0.8762  |
|                            |          |          |          |         |
| Group = PT2128             |          |          |          |         |
| contrast                   | estimate | SE       | z.ratio  | p.value |
| ConA-Media                 | -0.40109 | 0.218584 | -1.83496 | 0.2569  |
| ConA-WT                    | -1.10958 | 0.184644 | -6.00928 | <.0001  |
| ConA-LPS                   | -0.16425 | 0.238394 | -0.68898 | 0.9013  |
| Media-WT                   | -0.70848 | 0.205295 | -3.45105 | 0.0031  |
| Media-LPS                  | 0.236844 | 0.254725 | 0.929805 | 0.7889  |
| WT-LPS                     | 0.945328 | 0.226272 | 4.177834 | 0.0002  |

|                          |          |          |          |         |
|--------------------------|----------|----------|----------|---------|
| Group = PT32             |          |          |          |         |
| contrast                 | estimate | SE       | z.ratio  | p.value |
| ConA-Media               | 0.08338  | 0.304656 | 0.273686 | 0.9928  |
| ConA-WT                  | -1.24554 | 0.204482 | -6.09117 | <.0001  |
| ConA-LPS                 | -0.08588 | 0.294945 | -0.29116 | 0.9914  |
| Media-WT                 | -1.32892 | 0.291707 | -4.55566 | <.0001  |
| Media-LPS                | -0.16926 | 0.360933 | -0.46894 | 0.9659  |
| WT-LPS                   | 1.159659 | 0.281549 | 4.118856 | 0.0002  |
| <b>NKp46<sup>+</sup></b> |          |          |          |         |
| Group = Control          |          |          |          |         |
| contrast                 | estimate | SE       | z.ratio  | p.value |
| ConA-Media               | 0.663033 | 0.45719  | 1.450237 | 0.468   |
| ConA-WT                  | -0.78495 | 0.541547 | -1.44947 | 0.4684  |
| ConA-LPS                 | 0.271985 | 0.496263 | 0.548066 | 0.9471  |
| Media-WT                 | -1.44799 | 0.48703  | -2.9731  | 0.0156  |
| Media-LPS                | -0.39105 | 0.436121 | -0.89665 | 0.8066  |
| WT-LPS                   | 1.05694  | 0.523883 | 2.017513 | 0.1815  |
| Group = PT2128           |          |          |          |         |
| contrast                 | estimate | SE       | z.ratio  | p.value |
| ConA-Media               | -0.06269 | 0.355501 | -0.17636 | 0.9981  |
| ConA-WT                  | -0.80107 | 0.354101 | -2.26226 | 0.107   |
| ConA-LPS                 | -0.4181  | 0.393787 | -1.06175 | 0.7129  |
| Media-WT                 | -0.73837 | 0.341278 | -2.16355 | 0.1336  |
| Media-LPS                | -0.35541 | 0.382298 | -0.92967 | 0.7889  |
| WT-LPS                   | 0.382964 | 0.380997 | 1.005164 | 0.7464  |
| Group = PT32             |          |          |          |         |
| contrast                 | estimate | SE       | z.ratio  | p.value |
| ConA-Media               | 0.835225 | 0.384027 | 2.174914 | 0.1303  |
| ConA-WT                  | -1.2282  | 0.442151 | -2.77778 | 0.0281  |
| ConA-LPS                 | 0.785173 | 0.379409 | 2.069464 | 0.1632  |
| Media-WT                 | -2.06342 | 0.401976 | -5.1332  | <.0001  |
| Media-LPS                | -0.05005 | 0.33172  | -0.15089 | 0.9988  |
| WT-LPS                   | 2.013372 | 0.397567 | 5.064234 | <.0001  |

## References

1. **Park KT, Allen AJ, Bannantine JP, Seo KS, Hamilton MJ, Abdellrazeq GS, Rihan HM, Grimm A, Davis WC.** 2011. Evaluation of two mutants of *Mycobacterium avium* subsp. *paratuberculosis* as candidates for a live attenuated vaccine for Johne's disease. *Vaccine* **29**:4709-4719.
2. **Coussens PM, Verman N, Coussens MA, Elftman MD, McNulty AM.** 2004. Cytokine gene expression in peripheral blood mononuclear cells and tissues of cattle infected with *Mycobacterium avium* subsp. *paratuberculosis*: evidence for an inherent proinflammatory gene expression pattern. *Infect Immun* **72**:1409-1422.
